# Supplementary material
Source: PubMed Central journal article supplement (PMC3757123)
Supplement: NIHMS472450-supplement-supplementary_table_1.pdf [file NIHMS472450-supplement-supplementary_table_1.pdf]

**Supplementary Table.** Primers used for sequencing of Myo15A gene.

| Exon       | Forward Primer                    | Reverse primer                    |
|------------|-----------------------------------|-----------------------------------|
| 5'-UTR1    | AGC TGC TCA CTC CTT TCC AG        | CTG CCC CTT CCC TTA TCA C         |
| 5'-UTR2    | GAG CAC TGA TGT TGC CAT GA        | GTG CCT TCT TCC CCT TCT TC        |
| <b>2</b>   | Multiple – available upon request | Multiple – available upon request |
| <b>3</b>   | ATGACCAAGCCAGGGGTC                | CTCTGGCTGGGAGGGTG                 |
| <b>4</b>   | GACCCATGCCAGAACCAG                | AGAAATCTGTGCGTCCCACC              |
| <b>5</b>   | TAGGGGAGGGAGGGACATAG              | GGATCCAGGCTCCCAGAG                |
| <b>6-7</b> | GGGAGGTGTGGGAGCTTAG               | TCGGGAGTACATGAGGTGTG              |
| <b>8-9</b> | TGGGTGTCCCCAGCTATG                | CTGTACCTCCCACCCCG                 |
| <b>10</b>  | CTTGTATGTGTGCCTGGGG               | ATCACTCACAACCTCGGCTCC             |

|              |                           |                            |
|--------------|---------------------------|----------------------------|
| <b>11</b>    | AGAGCAGGACCTGGAGGG        | CTTGAAAAGACGGCCAAG         |
| <b>12</b>    | GACTACTGGCATGAGCCACA      | CACAAAGGATCGGCACAAG        |
| <b>13-14</b> | GCTTTCCGGAGGCAGAG         | GAGGGAGGCGAGACCTTG         |
| <b>15</b>    | AGGTAGGGGCAAACAGGC        | CTGTCTCCAAGGAGGTCCAC       |
| <b>16</b>    | ATTCAACATGGGAGGGAGG       | TGAGGACATGAGGCTGAGAG       |
| <b>17</b>    | ATAGTGAGGTTGCCACCAGG      | TCTCCAACAGCTAGCAGCAC       |
| <b>18</b>    | TCCCTCCTAGGATAGACAGAGAG   | AAGGCAGGCTGGGTGTG          |
| <b>19-20</b> | TTCCTCCTCATTTCGGTCTC      | CAAGGTCACACAGCATGGG        |
| <b>21</b>    | ATC TGC CCA GCC TAG CAC T | GCC TGG GTT GTG TAT TCC TG |
| <b>22</b>    | TAGCAGACACCTCGGGTAGG      | GACTCAGTAGTTGTGGACCCC      |
| <b>23</b>    | CTTAGTCCAGCCTCCTGGC       | TTCAGGCGTGACCTCTCC         |
| <b>24</b>    | AGGGCCTCTCTACCTTTTGG      | CTAAGTGCCCTTTCCCCTTC       |

|              |                        |                         |
|--------------|------------------------|-------------------------|
|              |                        |                         |
| <b>25-27</b> | GTGCCGGTCGTCACCTC      | CCCAGGGCAAGGACAATG      |
| <b>28</b>    | CACAGAGCAGTGGGTCCAG    | CTCATGGCCCAGTTTCAGG     |
| <b>29</b>    | GGGGACTGGAAGGAACAAC    | CTTTAAGACCCTGCCTTGGG    |
| <b>30</b>    | CAGCCCTCAGCCCCAAG      | ACTGGGCCCTGCTGACTC      |
| <b>31-32</b> | GCACAGCCAAACTGGACTC    | CCTTCTGCCTGGGAGTGG      |
| <b>33-34</b> | GGAGAAAGCCACTGAATACCAG | GAGAAGCTCTCAGGTCACCC    |
| <b>35-37</b> | AGTGTCAGGTGCCTGTTGC    | TCCTCTTTACAGCTTGTGTCTCC |
| <b>38-39</b> | TCTGGAGTCCCAGAGAGCAG   | GGCCATGATGGACTC         |
| <b>40-41</b> | ATGTGATGGGAAAGGGAGAC   | CTGTGCCACAGACTTCCTC     |
| <b>42</b>    | AGCGAAACTCCGTCTCAAAA   | CCCAAGTCCTAGACCCTCCT    |

|              |                        |                        |
|--------------|------------------------|------------------------|
| <b>43</b>    | GGGCGGAACTGCATTTAG     | CAAATCCCAACATGCAGAGG   |
| <b>44</b>    | AGTATAGTCCAGCCTGGGTCC  | CTGGCTGTGCCTCTGACTG    |
| <b>45-46</b> | CACCTCCCTCCCTGACATC    | TGCCGATGCCAGTCTGTAT    |
| <b>47</b>    | GGGCAGGACAGGATCAGAAG   | AGGGAGATCCCTGTTGCTG    |
| <b>48-49</b> | CTAGGCCTCTGGGAGTGG     | CACCACGAGTGGGTGAAAC    |
| <b>50</b>    | CCCCTTAGTCACAAGACAAGAC | TTATCCCCACTCGCCTCAC    |
| <b>51-52</b> | GCTAGGCGTGGTGTGGC      | GAACAAGTTTGTGTTGGCCCC  |
| <b>53</b>    | TGTGTCCCCTTTCTGTTCTG   | TGAAGATCAGGGAGGAGTGG   |
| <b>54</b>    | CCAGCTCAGACATGGAACAC   | TGATAGATGGGGAAACTGAACC |
| <b>55</b>    | GTGCCACCCCTGTTCCTTATG  | CCTCCTGGAGCATGGACAC    |
| <b>56</b>    | TCTCAGCTCAATCCCAGGAG   | TCCACCCAGTCCCCAAG      |
| <b>57</b>    | TTGTGGAGAGAATGCAGTGG   | GGATTACAGGTGCCTGCC     |

|                |                            |                            |
|----------------|----------------------------|----------------------------|
|                |                            |                            |
| <b>58</b>      | CAGGAGACAAGGGCTGTCC        | CTGGAGCCTGGGCTGTC          |
| <b>59</b>      | AGAAGGACAGAGGTCAAGCC       | AAATCTGGGTGGAGGGC          |
| <b>60</b>      | TCACCTGGGTAGCAGATTGG       | AGTCTGATTCACAGGCCCAG       |
| <b>61</b>      | CATGCATGTCCCCAGGTC         | TGAGAGGGCAGGGTTGC          |
| <b>62</b>      | ACAGTGAGGATTGCCTGAGC       | ATGACCACCCTCCTCAGC         |
| <b>63</b>      | GAAGCTATGCAGTTCAGGGC       | TGGGGACCAGGGAACAG          |
| <b>64</b>      | TGGTTGAGACTATCCTCGCC       | GACCTGACCTATCTTGGAGCC      |
| <b>65</b>      | CAAGGTAAGAGCTGGGGAAG       | TTGATCCTGAGAGGTTTCAGTG     |
| <b>3' UTR1</b> | CTG GAA CTG TGT CGT GTG GT | CTT GTT TTC CGG CCA CTT AG |
| <b>3' UTR2</b> | TCA GCC TGG ATT TCT GGT CT | AGC TAT GCC CCC ATC TAC CT |
